# Supplementary material for: Antimicrobial Oleogel Containing Sustainably Prepared Silver-Based Nanomaterials for Topical Application
Source: MDPI journal article supplement (doi:10.3390/jfb15010004), 2023-12-20
Supplement: s1 [file s1]

Article

# Antimicrobial Oleogel Containing Sustainably Prepared Silver-Based Nanomaterials for Topical Application

Valeria Ambrogio <sup>1,\*</sup>, Morena Nocchetti <sup>1</sup>, Donatella Pietrella <sup>2</sup>, Giulia Quaglia <sup>3</sup>, Alessandro Di Michele <sup>4</sup> and Loredana Latterini <sup>3</sup>

<sup>1</sup> Dipartimento di Scienze Farmaceutiche, University of Perugia, Via del Liceo 1, 06123 Perugia, Italy; morena.nocchetti@unipg.it

<sup>2</sup> Nano4Light Lab, Dipartimento di Chimica, Biologia e Biotecnologie, University of Perugia, Via Elce di Sotto 8, 06123 Perugia, Italy; donatella.pietrella@unipg.it

<sup>3</sup> Dipartimento di Medicina e Chirurgia, University of Perugia, Piazzale Lucio Severi 1, 06129 Perugia, Italy; quagliagiulia09@gmail.com (G.Q.); loredana.latterini@unipg.it (L.L.)

<sup>4</sup> Dipartimento di Fisica e Geologia, University of Perugia, Via Pascoli, 06123 Perugia, Italy; alessandro.dimichele@unipg.it

\* Correspondence: valeria.ambrogio@unipg.it; Tel.: +39-075-5855125

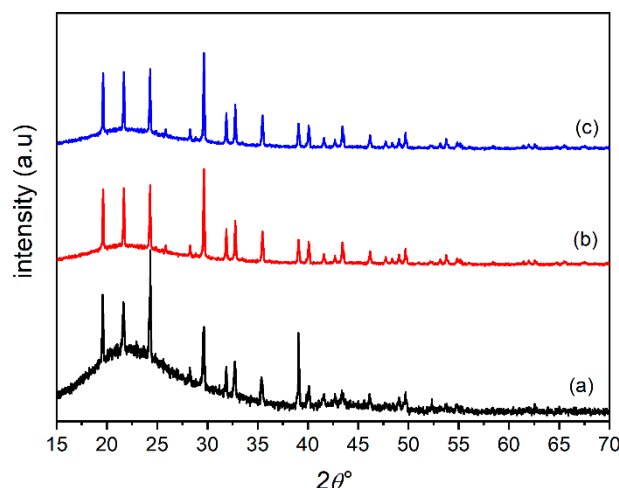

**Figure S1.** XRD of Cab-O-Sil/AgNO<sub>3</sub> physical mixture (a), Cab-O-Sil-Ag (b) and Cab-O-Sil-Ag-irr (c). The reflections are ascribable to orthorhombic phase of AgNO<sub>3</sub> (COD 1509468).

**Citation:** Ambrogio, V.; Nocchetti, M.; Pietrella, D.; Quaglia, G.; Di Michele, A.; Latterini, L. Antimicrobial Oleogel Containing Sustainably Prepared Silver-Based Nanomaterials for Topical Application. *J. Funct. Biomater.* **2023**, *15*, 4.  
<https://doi.org/10.3390/jfb15010004>

Academic Editors: Gopal Karunakaran and Pankaj Vadgama

Received: 3 November 2023

Revised: 10 December 2023

Accepted: 15 December 2023

Published: 20 December 2023

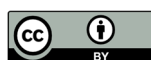

**Copyright:** © 2023 by the authors. Licensee MDPI, Basel, Switzerland. This article is an open access article distributed under the terms and conditions of the Creative Commons Attribution (CC BY) license (<https://creativecommons.org/licenses/by/4.0/>).

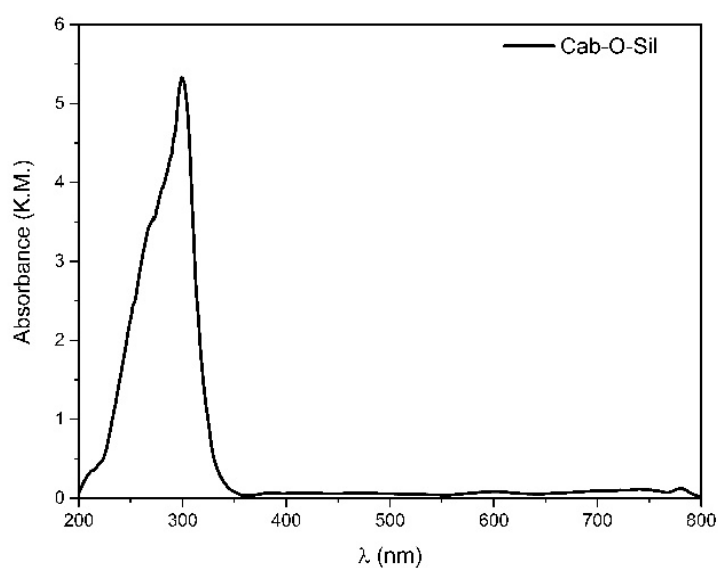

**Figure S2.** UV-Vis absorbance spectrum of Cab-O-Sil solid powder in Kubelka-Munk unit.

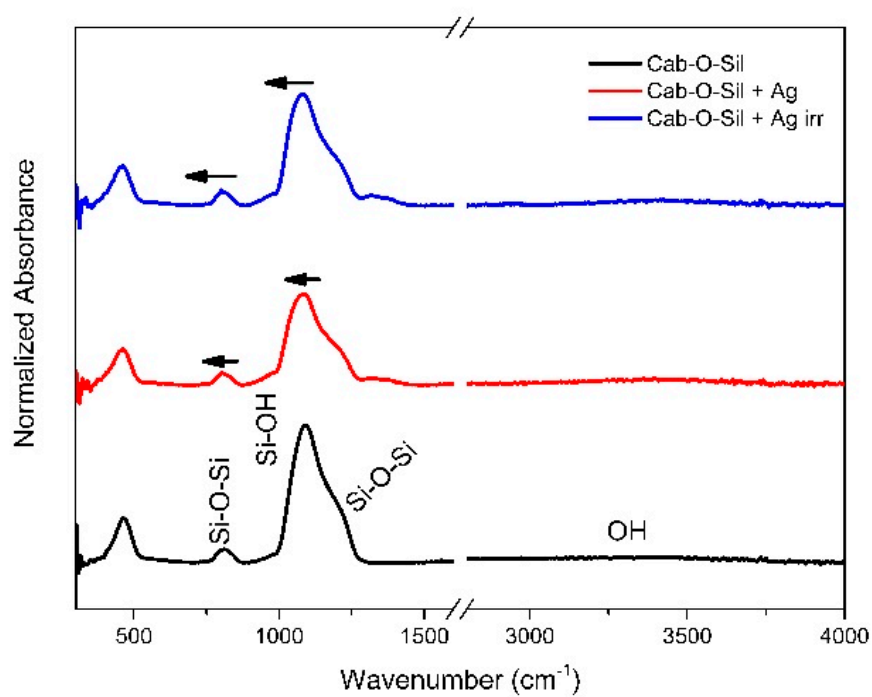

**Figure S3.** ATR-IR spectra of Cab-O-Sil (black line), Cab-O-Sil-Ag (red line) and Cab-O-Sil-Ag-irr (blue line).

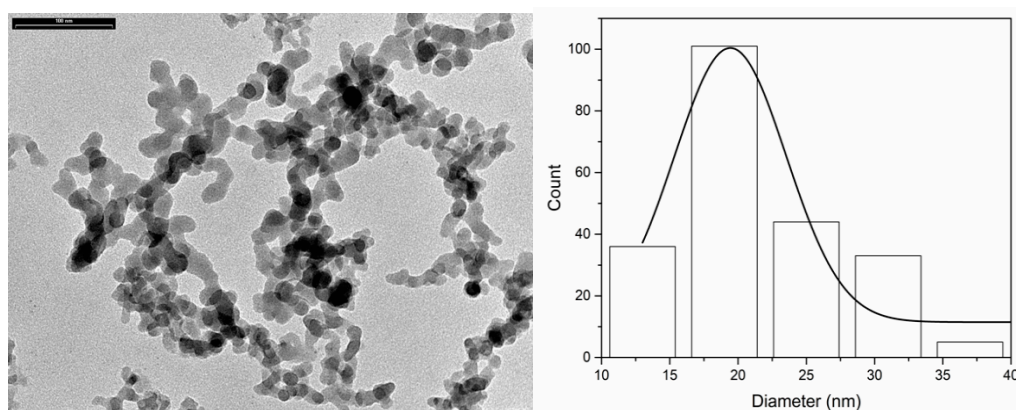

**Figure S4.** TEM image (A, scale bar: 100 nm) and size distribution (B) of Cab-O-Sil.

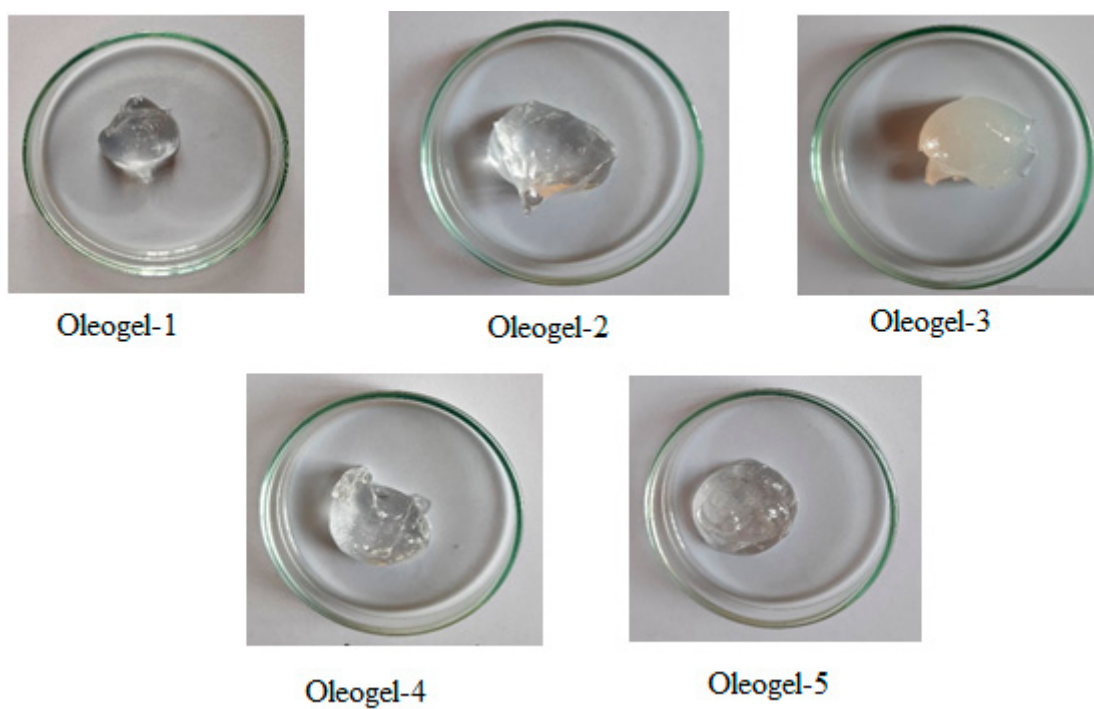

**Figure S5.** Just prepared oleogel images.

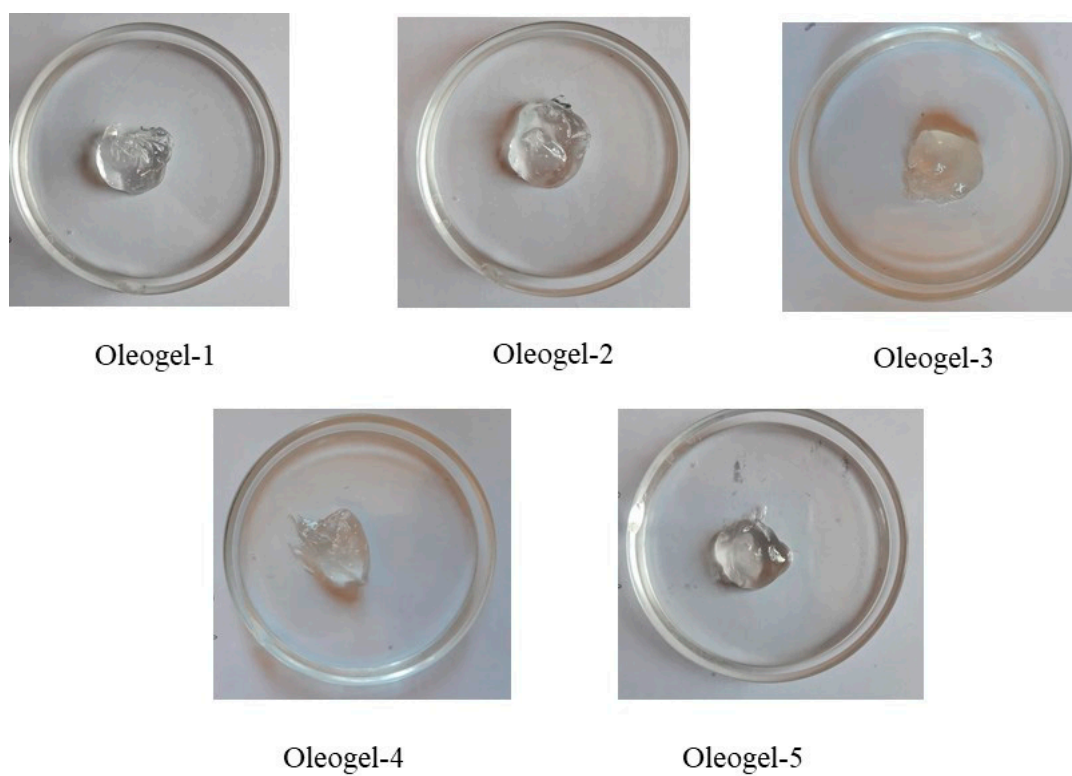

**Figure S6.** Oleogel images after 3 month of storage at room temperature.
